# Supplementary material for: MICA+ Tumor Cell Upregulated Macrophage-Secreted MMP9 via PROS1-AXL Axis to Induce Tumor Immune Escape in Advanced Hepatocellular Carcinoma (HCC)
Source: MDPI journal article supplement (doi:10.3390/cancers16020269), 2024-01-08
Supplement: s1 [file s1]

**Supplemental Table S1. Primer sequences.**

| Gene name | Sequence of primer(human)                                    |
|-----------|--------------------------------------------------------------|
| CD260     | F: TCGGGTTTATGGAGCAGGTG<br>R: TGAACGGGAATGCACAGGTT           |
| CD163     | F: GCAATGGGGTGGACTTACCT<br>R: TCACCATGCTTCACTTCAACAC         |
| MMP9      | F: CTGGTCCTGGTGCTCCTGGTG<br>R: CTGCCTGTCGGTGAGATTGGTTC       |
| AXL       | F: GAACCTTCAACTCCTGCCTTCTCG<br>R: CTCCATAACGGGTCTCCTTCTTTTCG |
| PROS1     | F: CCGTCTTGGACAAAGCAATGAAAGC<br>R: ACTGGTGTGGCACTGAATGGAAC   |

**Supplemental Table S2. Cell marker.**

| Cell                    | Marker            |
|-------------------------|-------------------|
| Endothelial cells       | PECAM1, CDH5      |
| Hepatic stellate cells  | ACTA2, PDGFRB     |
| Normal epithelial cells | EPCAM, KRT19      |
| Malignant cells         | AFP, GPC3         |
| NK cells                | KLRB1, KLRD1      |
| T cells                 | CD3D, CD4, CD8A   |
| Macrophages             | CD68, CD86, CD206 |
| Dendritic cells         | CD1C              |
| B cells                 | CD79A             |
